# Supplementary material for: Dual-scale TiO2 and SiO2 particles in combination with a fluoroalkylsilane and polydimethylsiloxane superhydrophobic/superoleophilic coating for efficient solvent–water separation
Source: Royal Society of Chemistry journal article supplement (doi:10.1039/c9ra02700a), 2019-01-01
Supplement: c9ra02700a1.pdf [file c9ra02700a1.pdf]

## Supporting Information

### Dual-scale TiO<sub>2</sub> and SiO<sub>2</sub> particles in combination with a fluoroalkylsilane and polydimethylsiloxane superhydrophobic/superoleophilic coating for efficient solvent-water separation.

Frances L. Heale<sup>1</sup>, Maud Einhorn<sup>1</sup>, Kristopher Page,<sup>1</sup> Ivan P. Parkin<sup>1</sup> and Claire J. Carmalt<sup>1\*</sup>

<sup>1</sup>Department of Chemistry, University College London, 20 Gordon Street, London, WC1H 0AJ.

\*Corresponding Author at: Department of Chemistry, University College London, 20 Gordon Street, London, WC1H 0AJ. United Kingdom. Tel: +44 20 7679 7528. E-mail address: [c.j.carmalt@ucl.ac.uk](mailto:c.j.carmalt@ucl.ac.uk) (C. J. Carmalt).

**Table S1.** Comprehensive list of various oil-water separation coatings comprising dual-scale surface roughening particles and surface energy lowering polymer mixtures. Hydrophobic-SiO<sub>2</sub> (H-SiO<sub>2</sub>) particles were generated by functionalising the as received SiO<sub>2</sub> mineral (5.00 g) in a 1H,1H,2H,2H-perfluorooctyltriethoxysilane (FAS) (1.00g)/ethanol (99.00 g) mixture.

| Particle Loading/g |           |                    |         | Mixture of Polymer Stock Solutions/g |       | Sylgard® 184:FAS ratio |
|--------------------|-----------|--------------------|---------|--------------------------------------|-------|------------------------|
| TiO <sub>2</sub>   |           | H-SiO <sub>2</sub> |         | Sylgard® 184                         | FAS   |                        |
| 21 nm              | 60-200 nm | 0.5-1.0 μm         | 5-15 μm |                                      |       |                        |
| 1.50               | 1.50      | -                  | -       | 30.00                                | -     | 1:0                    |
| 1.50               | 1.50      | -                  | -       | -                                    | 30.00 | 0:1                    |
| 1.50               | 1.50      | -                  | -       | 15.00                                | 15.00 | 1:1                    |
| 1.50               | 1.50      | -                  | -       | 6.00                                 | 24.00 | 1:4                    |
| 1.50               | 1.50      | -                  | -       | 3.00                                 | 27.00 | 1:9                    |
| 0.60               | -         | -                  | 0.60    | 30.00                                | 0.00  | 1:0                    |
| 0.60               | -         | -                  | 0.60    | 0.00                                 | 30.00 | 0:1                    |
| 0.60               | -         | -                  | 0.60    | 15.00                                | 15.00 | 1:1                    |
| 0.60               | -         | -                  | 0.60    | 6.00                                 | 24.00 | 1:4                    |
| 0.60               | -         | -                  | 0.60    | 3.00                                 | 27.00 | 1:9                    |
| -                  | -         | 0.60               | 0.60    | 30.00                                | -     | 1:0                    |
| -                  | -         | 0.60               | 0.60    | -                                    | 30.00 | 0:1                    |
| -                  | -         | 0.60               | 0.60    | 15.00                                | 15.00 | 1:1                    |
| -                  | -         | 0.60               | 0.60    | 6.00                                 | 24.00 | 1:4                    |
| -                  | -         | 0.60               | 0.60    | 3.00                                 | 27.00 | 1:9                    |

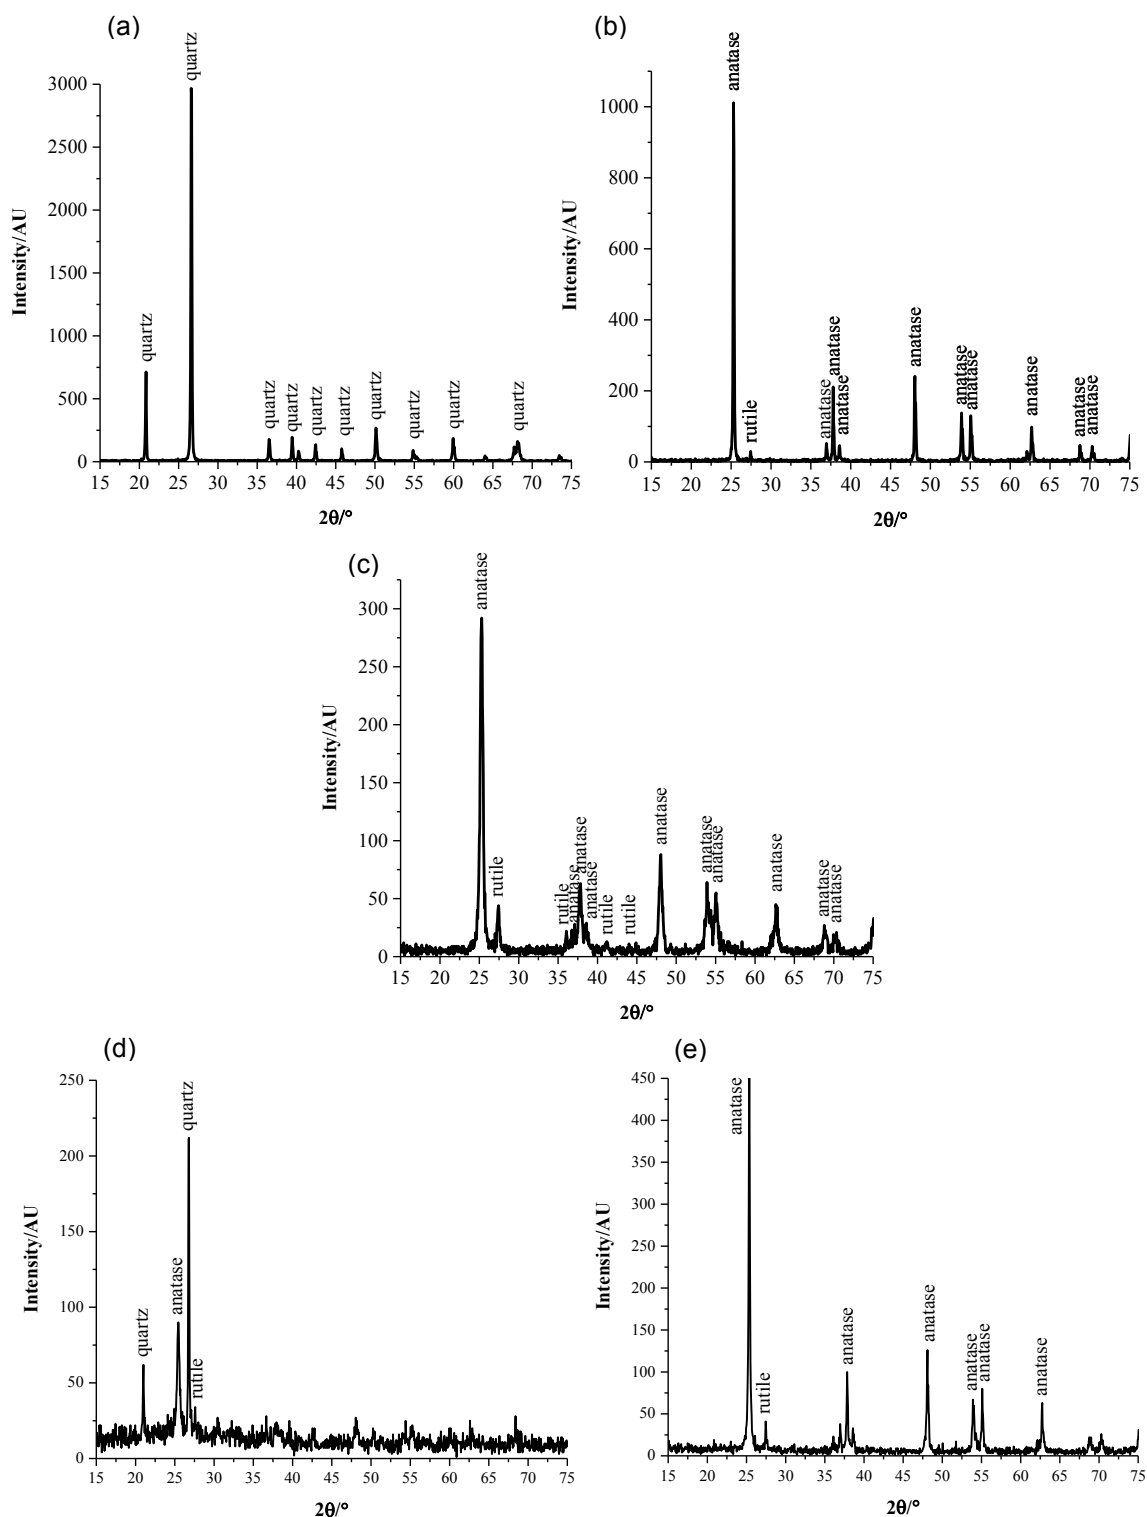

**Figure S1.** X-ray diffraction (XRD) patterns of (a)  $\text{SiO}_2$  5-15  $\mu\text{m}$  particles, (b)  $\text{TiO}_2$  60-200 nm particles, (c)  $\text{TiO}_2$  21 nm particles, (d) coating D consisting of  $\text{SiO}_2$  5-15  $\mu\text{m}$  particles (0.6 g) and  $\text{TiO}_2$  21 nm particles (0.6 g) in a 1:9 polymer mixture of Sylgard® 184 and FAS and (e) coating F comprising  $\text{TiO}_2$  60-200 nm particles (1.5 g) and  $\text{TiO}_2$  21 nm particles (1.5 g) in a 1:1 mixture of Sylgard® 184 and 1H,1H,2H,2H-perfluorooctyltriethoxysilane (FAS).

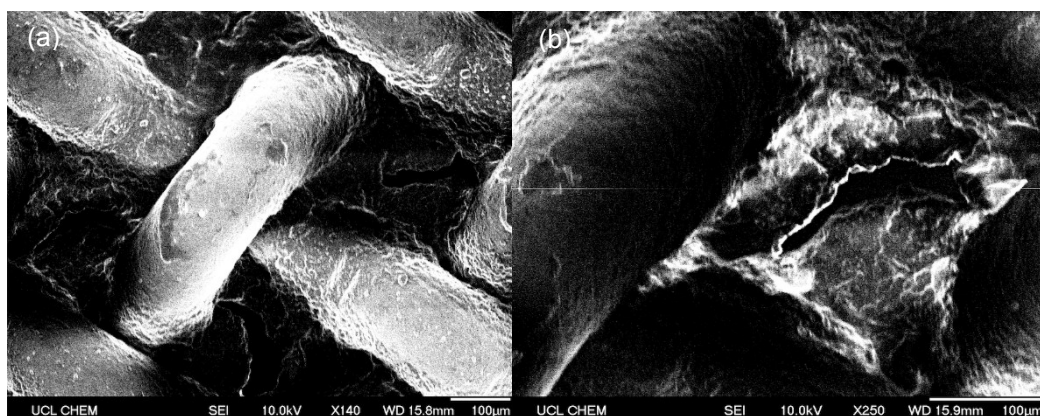

**Figure S2.** Scanning electron microscope (SEM) images of copper 60 mesh substrates coated with 60-200 nm and 21 nm particles  $\text{TiO}_2$  particles (totalling 3.0 g in equal parts) in **(a)** 1:1 polymer mixture of Sylgard® 184:FAS (30.0 g) and **(b)** 1:0 polymer mixture of Sylgard® 184:FAS (30.0 g). Pores are obstructed in both images but the coating is visibly thicker in **(b)**.

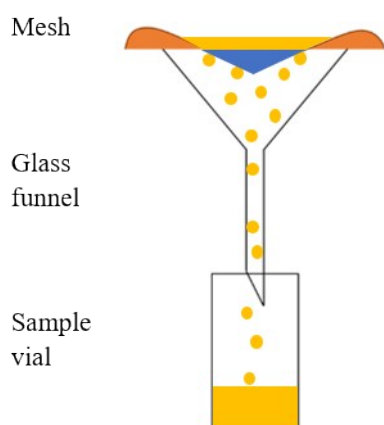

**Figure S3.** Schematic of solvent (yellow) permeating through holes in the functional solvent-water separation device. Water (blue) was unable to flow through mesh pores and therefore collected on the surface. The mass of solvent collected after 30 s of separation provided relevant information for the calculation of a comparable separation efficiency percentage.

**Table S2.** Toluene, hexane and dichloromethane-water separation efficiencies on functionalised 60 and 100 mesh copper substrates. Coating **D** consists of H-SiO<sub>2</sub> 5-15 µm particles (0.6 g) with TiO<sub>2</sub> 21 nm particles (0.6 g) in a 1:9 mixture of Sylgard® 184 to FAS. Coating **E** comprises of H-SiO<sub>2</sub> 5-15 µm particles (0.6 g) with TiO<sub>2</sub> 21 nm particles (0.6 g) in a 0:1 mixture of Sylgard® 184 to FAS. Coating **F** consists of TiO<sub>2</sub> 60-200 nm particles (1.5 g) and TiO<sub>2</sub> 21 nm particles (1.5 g) in a 1:4 mixture of Sylgard® 184 and FAS. Coating **G** contains H-SiO<sub>2</sub> 5-15 µm particles (0.6 g) with TiO<sub>2</sub> 21 nm particles (0.6 g) in a 1:4 mixture of Sylgard® 184 to FAS. Hydrophobic-SiO<sub>2</sub> (H-SiO<sub>2</sub>) particles were generated by functionalising the as received SiO<sub>2</sub> mineral (5.00 g) in a 1H,1H,2H,2H-perfluorooctyltriethoxysilane (FAS) (1.00g)/ethanol (99.00 g) mixture.

| Coating Label | Mesh Pore Size | Solvent Percentage in Solvent-water Mixture Used for Solvent Separation Efficiency Testing/% |              |                       | Solvent Separation Efficiency/% |       |
|---------------|----------------|----------------------------------------------------------------------------------------------|--------------|-----------------------|---------------------------------|-------|
|               |                | Toluene-water                                                                                | Hexane-water | Dichloromethane-water | Average                         | Error |
| <b>D</b>      | 60             | 50                                                                                           | -            | -                     | 100                             | 0     |
| <b>E</b>      | 60             | 50                                                                                           | -            | -                     | 94                              | 2     |
| <b>F</b>      | 60             | 50                                                                                           | -            | -                     | 100                             | 0     |
| <b>G</b>      | 60             | 50                                                                                           | -            | -                     | 95                              | 2     |
| <b>D</b>      | 60             | -                                                                                            | 50           | -                     | 77                              | 3     |
| <b>E</b>      | 60             | -                                                                                            | 50           | -                     | 79                              | 1     |
| <b>F</b>      | 60             | -                                                                                            | 50           | -                     | 85                              | 1     |
| <b>G</b>      | 60             | -                                                                                            | 50           | -                     | 87                              | 0     |
| <b>D</b>      | 60             | -                                                                                            | -            | 50                    | 96                              | 1     |
| <b>E</b>      | 60             | -                                                                                            | -            | 50                    | 59                              | 1     |
| <b>F</b>      | 60             | -                                                                                            | -            | 50                    | 97                              | 1     |
| <b>G</b>      | 60             | -                                                                                            | -            | 50                    | 60                              | 1     |
| <b>D</b>      | 100            | 50                                                                                           | -            | -                     | 93                              | 4     |
| <b>E</b>      | 100            | 50                                                                                           | -            | -                     | 99                              | 1     |
| <b>F</b>      | 100            | 50                                                                                           | -            | -                     | 89                              | 3     |
| <b>G</b>      | 100            | 50                                                                                           | -            | -                     | 96                              | 1     |
| <b>D</b>      | 100            | -                                                                                            | 50           | -                     | 86                              | 3     |
| <b>E</b>      | 100            | -                                                                                            | 50           | -                     | 88                              | 5     |
| <b>F</b>      | 100            | -                                                                                            | 50           | -                     | 78                              | 2     |
| <b>G</b>      | 100            | -                                                                                            | 50           | -                     | 85                              | 2     |
